# Supplementary material
Source: publisher site journal article supplement (https://thieme-connect.com/media/10.1055-s-00035024/201606/supmat/10-1160-th16-02-0151-supp.pdf)
Supplement: Supplementary file 1 [file 10-1160-th16-02-0151-supp.pdf]

**Supplementary Material to Zhang et al. “A genome-wide association study identifies genes in the kallikrein-kinin system associated with serum L-arginine levels” (Thromb Haemost 2016; 116.6)**

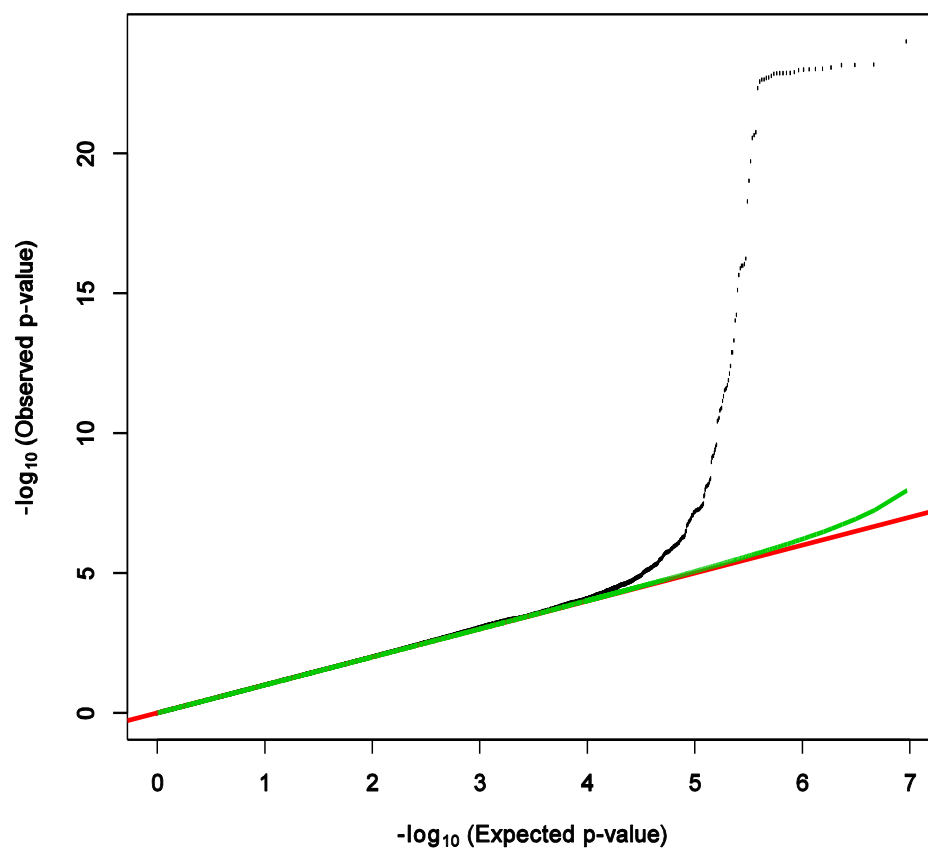

Suppl. Figure 1. Quantile-quantile (QQ) plot of combined GWAS results of serum L-arginine levels. The black dot represents observed association for each variant. The red line is expected under the null hypothesis of no association and the green curve is its 90% confidence interval upper limit.

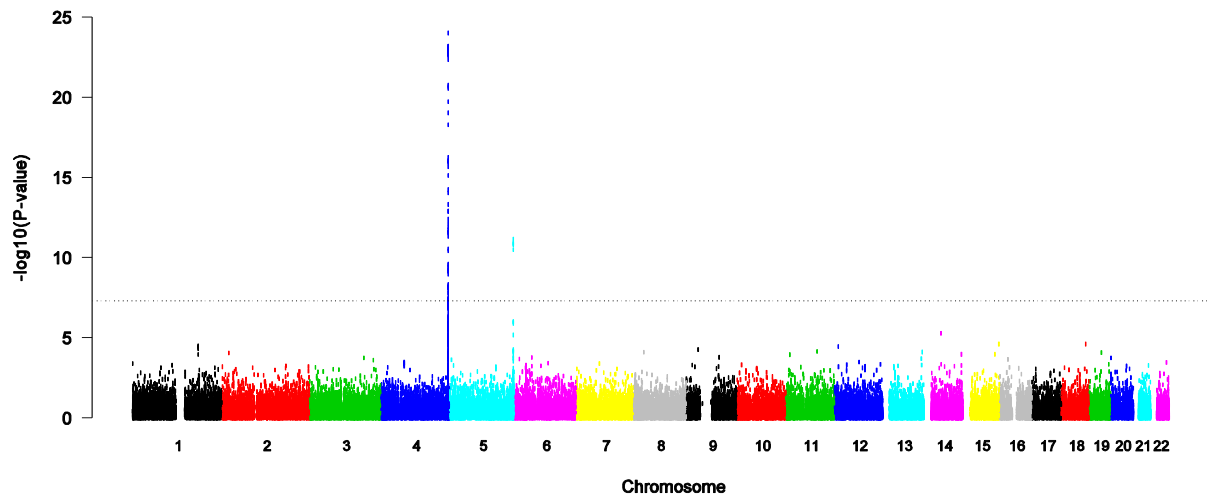

Suppl. Figure 2. Manhattan plot of results for GWAS of serum L-arginine levels, dotted line indicates the genome-wide significance threshold ( $p < 5 \times 10^{-8}$ ).

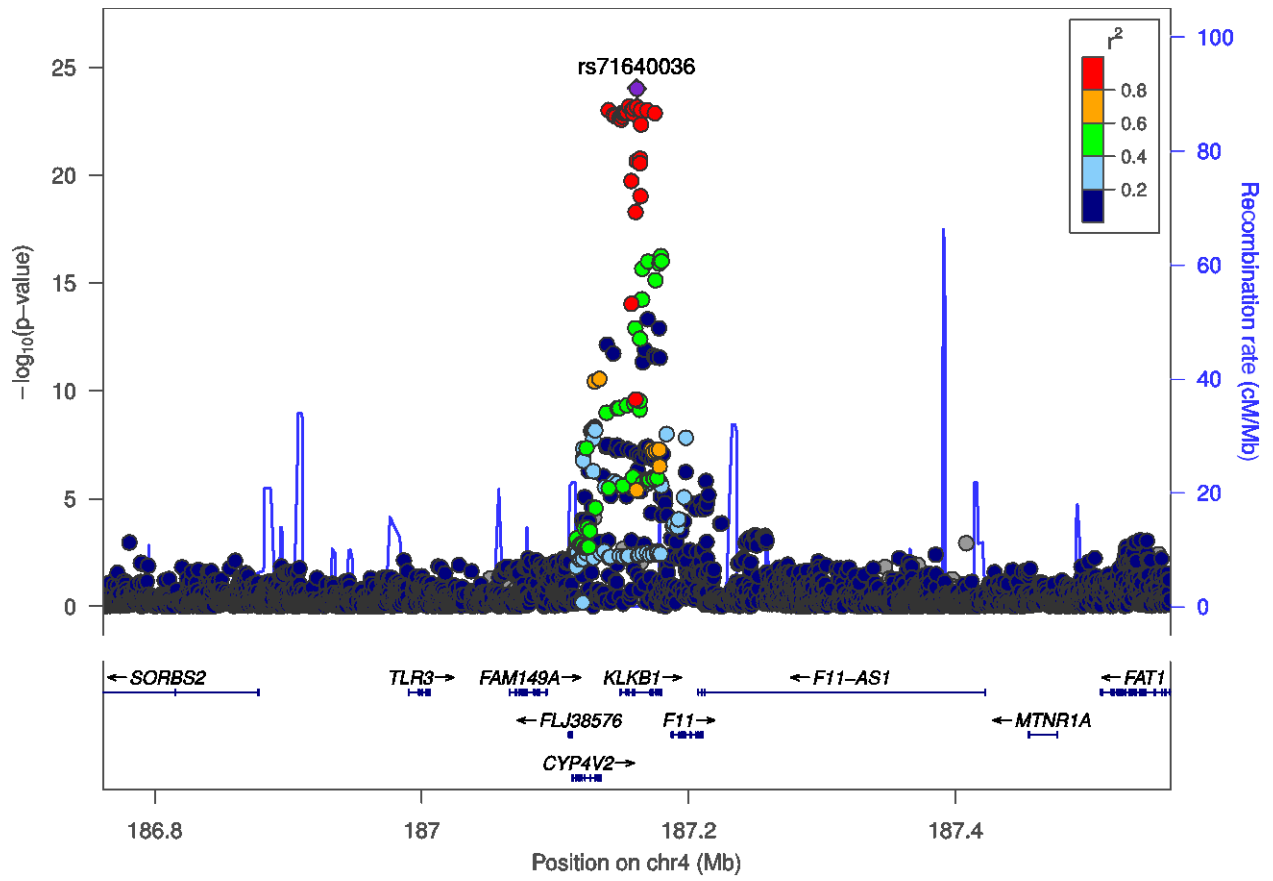

Suppl. Figure 3. Regional plot of associations at the *KLKB1* locus.

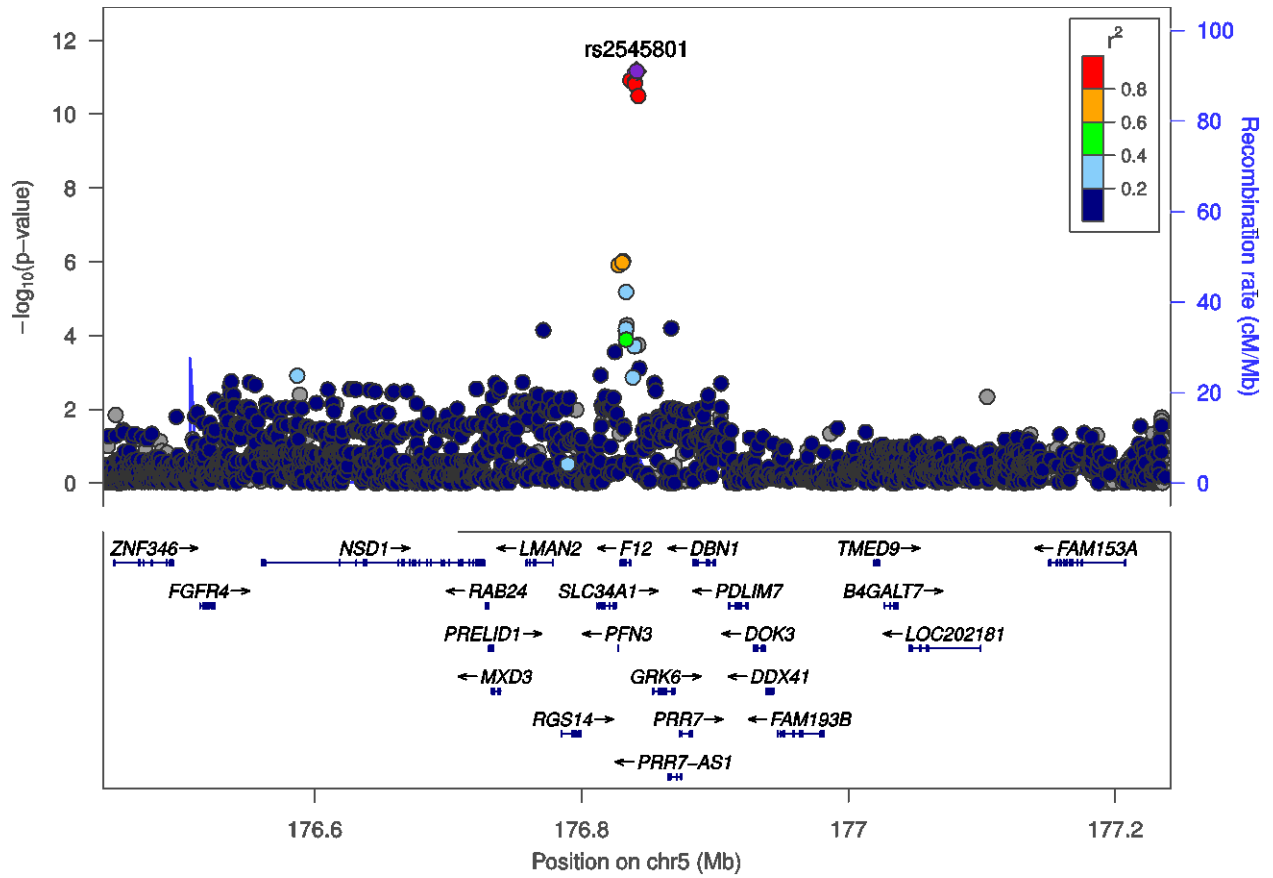

Suppl. Figure 4. Regional plot of associations at the *F12* locus.

**Suppl. Table 1. Association of serum L-arginine with clinical characteristics in the discovery cohorts. Results are shown as the change in L-arginine concentration (effect and standard error) associated with the clinical characteristic by linear regression analysis (adjusted for age, gender and ethnicity).**

| Trait                                    | Effect | SE   | P                     |
|------------------------------------------|--------|------|-----------------------|
| Current smoking (yes vs no)              | 4.7    | 2.1  | $2.9 \times 10^{-2}$  |
| Alcohol drinking (yes vs no)             | -0.5   | 1.5  | $7.6 \times 10^{-1}$  |
| Type 2 diabetes (yes vs no)              | -7.0   | 1.9  | $1.9 \times 10^{-4}$  |
| Coronary heart disease (yes vs no)       | -6.5   | 3.2  | $4.1 \times 10^{-2}$  |
| Hypertension (yes vs no)                 | 1.7    | 1.4  | $2.3 \times 10^{-1}$  |
| Body mass index (kg/m <sup>2</sup> )     | 0.4    | 0.1  | $1.2 \times 10^{-2}$  |
| Waist hip ratio                          | 21.6   | 9.4  | $2.2 \times 10^{-2}$  |
| Diastolic blood pressure (mmHg)          | 0.21   | 0.07 | $1.3 \times 10^{-3}$  |
| Systolic blood pressure (mmHg)           | 0.10   | 0.04 | $1.0 \times 10^{-2}$  |
| Cholesterol (mmol/L)                     | 5.0    | 0.6  | $9.6 \times 10^{-16}$ |
| Triglycerides (mmol/ L)                  | 6.8    | 1.3  | $8.6 \times 10^{-8}$  |
| LDL cholesterol (mmol/L)                 | 5.7    | 0.7  | $2.3 \times 10^{-14}$ |
| HDL cholesterol (mmol/ L)                | 1.2    | 2.1  | $5.6 \times 10^{-1}$  |
| Glucose (mmol/L)                         | -7.9   | 2.9  | $6.1 \times 10^{-3}$  |
| Insulin (IU/L)                           | 3.5    | 0.9  | $1.1 \times 10^{-4}$  |
| HbA1c (%)                                | -0.6   | 4.3  | $8.8 \times 10^{-1}$  |
| HOMA-IR                                  | 2.2    | 0.8  | $7.7 \times 10^{-3}$  |
| High-sensitive C-reactive protein (mg/L) | 4.8    | 0.5  | $< 2 \times 10^{-16}$ |
| Creatinine (μmol/L)                      | 6.0    | 4.5  | $1.8 \times 10^{-1}$  |

Footnotes: Triglycerides, glucose, insulin, HOMA-IR, HbA1c, High-sensitive C-reactive protein and creatinine were natural log transformed to approach approximate normality before regression analysis.

**Suppl. Table 2. Characteristics of participants in the replication cohorts. Results are presented as mean (SD) for continuous traits and percentage for categorical traits.**

| <b>Trait</b>                              | <b>FHS</b>  | <b>EPIC-Norfolk</b> |
|-------------------------------------------|-------------|---------------------|
| <b>Sample Size</b>                        | 2,992       | 1,000               |
| <b>Age (yrs)</b>                          | 59.0 (9.7)  | 69.3 (7.3)          |
| <b>Female (%)</b>                         | 54          | 52                  |
| <b>Current smoking (%)</b>                | 15          | 18                  |
| <b>Type 2 diabetes (%)</b>                | 11          | 4                   |
| <b>Body mass index (kg/m<sup>2</sup>)</b> | 27.9 (5.1)  | 26.7 (4.0)          |
| <b>Diastolic blood pressure (mmHg)</b>    | 75 (9)      | 85.5 (11.9)         |
| <b>Systolic blood pressure (mmHg)</b>     | 128 (19)    | 143.7 (18.9)        |
| <b>Plasma L-arginine (μmol/L)</b>         | 78.9 (27.9) | 52.7 (16.6)         |

Footnotes: FHS, Framingham Heart Study; EPIC-Norfolk, the European Prospective Investigation into Cancer, Norfolk.

**Suppl. Table 3. SNPs associated with serum L-arginine levels in combined analysis of European (N = 901) and Indian Asian (N = 1,394) samples ( $p < 5 \times 10^{-8}$ ).**

| SNP        | Chromosome: Position | EA | AA | European |             |                    | Indian Asian |             |                     | Meta        |                     |       | Function Class     |
|------------|----------------------|----|----|----------|-------------|--------------------|--------------|-------------|---------------------|-------------|---------------------|-------|--------------------|
|            |                      |    |    | EA       | Effect (SE) | P                  | EA           | Effect (SE) | P                   | Effect (SE) | P                   | P-het |                    |
| rs2292428  | 4:187121070          | C  | T  | 0.41     | -3.3 (1.5)  | $3 \times 10^{-2}$ | 0.53         | -6.9 (1.3)  | $9 \times 10^{-8}$  | -5.4 (1.0)  | $5 \times 10^{-8}$  | 0.07  | CYP4V2 intron      |
| rs6835839  | 4:187123582          | G  | T  | 0.41     | -3.3 (1.5)  | $3 \times 10^{-2}$ | 0.53         | -6.9 (1.3)  | $8 \times 10^{-8}$  | -5.4 (1.0)  | $5 \times 10^{-8}$  | 0.07  | CYP4V2 intron      |
| rs34733777 | 4:187126857          | C  | A  | 0.41     | -3.2 (1.5)  | $4 \times 10^{-2}$ | 0.53         | -7.5 (1.3)  | $6 \times 10^{-9}$  | -5.7 (1.0)  | $8 \times 10^{-9}$  | 0.03  | CYP4V2 intron      |
| rs1473597  | 4:187127817          | G  | A  | 0.41     | -3.2 (1.5)  | $4 \times 10^{-2}$ | 0.53         | -7.4 (1.3)  | $7 \times 10^{-9}$  | -5.7 (1.0)  | $8 \times 10^{-9}$  | 0.03  | CYP4V2 intron      |
| rs6552964  | 4:187128491          | G  | A  | 0.41     | -3.2 (1.5)  | $3 \times 10^{-2}$ | 0.53         | -7.5 (1.3)  | $6 \times 10^{-9}$  | -5.7 (1.0)  | $7 \times 10^{-9}$  | 0.03  | CYP4V2 intron      |
| rs6552965  | 4:187128553          | G  | A  | 0.40     | -2.8 (1.5)  | $7 \times 10^{-2}$ | 0.53         | -7.5 (1.3)  | $6 \times 10^{-9}$  | -5.6 (1.0)  | $2 \times 10^{-8}$  | 0.02  | CYP4V2 intron      |
| rs12508707 | 4:187128580          | A  | G  | 0.43     | 4.3 (1.6)   | $7 \times 10^{-2}$ | 0.31         | 8.0 (1.5)   | $8 \times 10^{-8}$  | 6.3 (1.1)   | $8 \times 10^{-9}$  | 0.09  | CYP4V2 intron      |
| rs9685463  | 4:187129771          | A  | G  | 0.41     | -3.4 (1.5)  | $3 \times 10^{-2}$ | 0.53         | -7.5 (1.3)  | $6 \times 10^{-9}$  | -5.8 (1.0)  | $5 \times 10^{-9}$  | 0.04  | CYP4V2 intron      |
| rs7377304  | 4:187129780          | G  | T  | 0.49     | 5.3 (1.5)   | $4 \times 10^{-4}$ | 0.32         | 7.9 (1.4)   | $9 \times 10^{-9}$  | 6.7 (1.0)   | $4 \times 10^{-11}$ | 0.2   | CYP4V2 intron      |
| rs9684134  | 4:187129814          | G  | A  | 0.41     | -3.3 (1.5)  | $3 \times 10^{-2}$ | 0.53         | -7.4 (1.3)  | $7 \times 10^{-9}$  | -5.7 (1.0)  | $6 \times 10^{-9}$  | 0.04  | CYP4V2 intron      |
| rs2276917  | 4:187129995          | G  | A  | 0.41     | -3.3 (1.5)  | $3 \times 10^{-2}$ | 0.53         | -7.4 (1.3)  | $7 \times 10^{-9}$  | -5.7 (1.0)  | $7 \times 10^{-9}$  | 0.04  | CYP4V2 intron      |
| rs1053094  | 4:187133031          | T  | A  | 0.49     | 5.5 (1.6)   | $2 \times 10^{-4}$ | 0.33         | 7.9 (1.4)   | $1 \times 10^{-8}$  | 6.8 (1.0)   | $3 \times 10^{-11}$ | 0.25  | CYP4V2 utr-3-prime |
| rs35834666 | 4:187138175          | C  | T  | 0.11     | -6.4 (2.4)  | $7 \times 10^{-3}$ | 0.18         | -8.3 (1.7)  | $1 \times 10^{-6}$  | -7.6 (1.4)  | $4 \times 10^{-8}$  | 0.52  | NA                 |
| rs13136536 | 4:187138463          | G  | C  | 0.63     | 6.2 (1.5)   | $4 \times 10^{-5}$ | 0.58         | 6.0 (1.3)   | $6 \times 10^{-6}$  | 6.1 (1.0)   | $1 \times 10^{-9}$  | 0.94  | NA                 |
| rs12639909 | 4:187138801          | A  | G  | 0.11     | 9.1 (2.5)   | $2 \times 10^{-4}$ | 0.23         | 9.3 (1.5)   | $7 \times 10^{-10}$ | 9.3 (1.3)   | $7 \times 10^{-13}$ | 0.93  | NA                 |
| rs34852777 | 4:187139062          | C  | T  | 0.11     | -6.4 (2.4)  | $7 \times 10^{-3}$ | 0.18         | -8.3 (1.7)  | $1 \times 10^{-6}$  | -7.7 (1.4)  | $3 \times 10^{-8}$  | 0.52  | NA                 |
| rs12331618 | 4:187139939          | G  | A  | 0.52     | 8.8 (1.5)   | $3 \times 10^{-9}$ | 0.40         | 10.8 (1.3)  | $2 \times 10^{-16}$ | 9.9 (1.0)   | $1 \times 10^{-23}$ | 0.3   | NA                 |
| rs58370149 | 4:187143546          | C  | G  | 0.11     | 9.0 (2.5)   | $3 \times 10^{-4}$ | 0.24         | 9.0 (1.5)   | $2 \times 10^{-9}$  | 9.0 (1.3)   | $2 \times 10^{-12}$ | 0.99  | NA                 |
| rs11132382 | 4:187143802          | G  | T  | 0.52     | 8.8 (1.5)   | $3 \times 10^{-9}$ | 0.40         | 10.6 (1.3)  | $5 \times 10^{-16}$ | 9.8 (1.0)   | $2 \times 10^{-23}$ | 0.36  | NA                 |
| rs4862669  | 4:187145222          | C  | G  | 0.52     | 8.8 (1.5)   | $3 \times 10^{-9}$ | 0.40         | 10.5 (1.3)  | $6 \times 10^{-16}$ | 9.8 (1.0)   | $2 \times 10^{-23}$ | 0.37  | NA                 |
| rs35669195 | 4:187146559          | C  | T  | 0.11     | -6.5 (2.4)  | $6 \times 10^{-3}$ | 0.17         | -8.2 (1.7)  | $1 \times 10^{-6}$  | -7.6 (1.4)  | $4 \times 10^{-8}$  | 0.57  | KLKB1 upstream-2KB |
| rs9994208  | 4:187146687          | G  | A  | 0.63     | 6.5 (1.5)   | $2 \times 10^{-5}$ | 0.58         | 5.8 (1.3)   | $8 \times 10^{-6}$  | 6.1 (1.0)   | $6 \times 10^{-10}$ | 0.75  | KLKB1 upstream-2KB |
| rs4253236  | 4:187148071          | C  | T  | 0.63     | 6.4 (1.5)   | $2 \times 10^{-5}$ | 0.57         | 5.9 (1.3)   | $7 \times 10^{-6}$  | 6.1 (1.0)   | $6 \times 10^{-10}$ | 0.77  | KLKB1 upstream-2KB |
| rs2048     | 4:187148133          | T  | G  | 0.52     | 8.8 (1.5)   | $3 \times 10^{-9}$ | 0.40         | 10.5 (1.3)  | $7 \times 10^{-16}$ | 9.7 (1.0)   | $2 \times 10^{-23}$ | 0.38  | KLKB1 upstream-2KB |
| rs4253238  | 4:187148387          | T  | C  | 0.52     | 8.8 (1.5)   | $3 \times 10^{-9}$ | 0.40         | 10.5 (1.3)  | $7 \times 10^{-16}$ | 9.7 (1.0)   | $2 \times 10^{-23}$ | 0.38  | KLKB1 upstream-2KB |

| SNP         | Chromosome: Position | EA | AA | European |             |                    | Indian Asian |             |                     | Meta        |                     |       | Function Class |
|-------------|----------------------|----|----|----------|-------------|--------------------|--------------|-------------|---------------------|-------------|---------------------|-------|----------------|
|             |                      |    |    | EAF      | Effect (SE) | P                  | EAF          | Effect (SE) | P                   | Effect (SE) | P                   | P-het |                |
| rs1912826   | 4:187149540          | A  | G  | 0.52     | 8.7 (1.5)   | $2 \times 10^{-9}$ | 0.40         | 10.5 (1.3)  | $6 \times 10^{-16}$ | 9.8 (1.0)   | $3 \times 10^{-23}$ | 0.36  | KLKB1 intron   |
| rs3775298   | 4:187150478          | G  | A  | 0.52     | 8.8 (1.5)   | $2 \times 10^{-9}$ | 0.40         | 10.5 (1.3)  | $9 \times 10^{-16}$ | 9.8 (1.0)   | $2 \times 10^{-23}$ | 0.4   | KLKB1 intron   |
| rs1511801   | 4:187150710          | T  | A  | 0.52     | 8.9 (1.5)   | $1 \times 10^{-9}$ | 0.40         | 10.5 (1.3)  | $9 \times 10^{-16}$ | 9.8 (1.0)   | $1 \times 10^{-23}$ | 0.44  | KLKB1 intron   |
| rs4241815   | 4:187152142          | T  | C  | 0.52     | 8.9 (1.5)   | $2 \times 10^{-9}$ | 0.40         | 10.6 (1.3)  | $6 \times 10^{-16}$ | 9.8 (1.0)   | $1 \times 10^{-23}$ | 0.39  | KLKB1 intron   |
| rs4241816   | 4:187152327          | T  | A  | 0.52     | 8.9 (1.5)   | $2 \times 10^{-9}$ | 0.40         | 10.6 (1.3)  | $6 \times 10^{-16}$ | 9.8 (1.0)   | $1 \times 10^{-23}$ | 0.38  | KLKB1 intron   |
| rs4241817   | 4:187152658          | C  | T  | 0.52     | 8.8 (1.5)   | $2 \times 10^{-9}$ | 0.40         | 10.6 (1.3)  | $6 \times 10^{-16}$ | 9.8 (1.0)   | $1 \times 10^{-23}$ | 0.38  | KLKB1 intron   |
| rs4253244   | 4:187153775          | A  | C  | 0.63     | 6.5 (1.5)   | $2 \times 10^{-5}$ | 0.58         | 5.9 (1.3)   | $6 \times 10^{-16}$ | 6.2 (1.0)   | $5 \times 10^{-10}$ | 0.79  | KLKB1 intron   |
| rs4241818   | 4:187153786          | C  | T  | 0.52     | 8.8 (1.5)   | $2 \times 10^{-9}$ | 0.40         | 10.6 (1.3)  | $6 \times 10^{-16}$ | 9.8 (1.0)   | $1 \times 10^{-23}$ | 0.37  | KLKB1 intron   |
| rs4253248   | 4:187155488          | A  | G  | 0.52     | 8.8 (1.5)   | $2 \times 10^{-9}$ | 0.40         | 10.7 (1.3)  | $3 \times 10^{-16}$ | 9.9 (1.0)   | $7 \times 10^{-24}$ | 0.34  | KLKB1 intron   |
| rs4241819   | 4:187157140          | T  | C  | 0.48     | 8.2 (1.5)   | $7 \times 10^{-8}$ | 0.35         | 10.8 (1.4)  | $2 \times 10^{-14}$ | 9.6 (1.0)   | $2 \times 10^{-20}$ | 0.21  | KLKB1 intron   |
| rs4861708   | 4:187157233          | A  | G  | 0.38     | 6.6 (1.7)   | $6 \times 10^{-5}$ | 0.28         | 11.3 (1.6)  | $4 \times 10^{-12}$ | 9.0 (1.2)   | $9 \times 10^{-15}$ | 0.05  | KLKB1 intron   |
| rs4253252   | 4:187157458          | G  | T  | 0.52     | 8.8 (1.5)   | $2 \times 10^{-9}$ | 0.40         | 10.7 (1.3)  | $4 \times 10^{-16}$ | 9.9 (1.0)   | $9 \times 10^{-24}$ | 0.35  | KLKB1 intron   |
| rs3733402   | 4:187158034          | A  | G  | 0.52     | 8.8 (1.5)   | $2 \times 10^{-9}$ | 0.40         | 10.7 (1.3)  | $4 \times 10^{-16}$ | 9.9 (1.0)   | $1 \times 10^{-23}$ | 0.34  | KLKB1 missense |
| rs4253254   | 4:187158508          | T  | C  | 0.52     | 8.8 (1.5)   | $3 \times 10^{-9}$ | 0.40         | 10.7 (1.3)  | $4 \times 10^{-16}$ | 9.8 (1.0)   | $1 \times 10^{-23}$ | 0.32  | KLKB1 intron   |
| rs4253255   | 4:187158922          | C  | G  | 0.52     | 8.8 (1.5)   | $2 \times 10^{-9}$ | 0.40         | 10.7 (1.3)  | $3 \times 10^{-16}$ | 9.9 (1.0)   | $8 \times 10^{-24}$ | 0.34  | KLKB1 intron   |
| rs4253256   | 4:187159282          | C  | G  | 0.63     | 6.4 (1.5)   | $2 \times 10^{-5}$ | 0.58         | 6.0 (1.3)   | $4 \times 10^{-6}$  | 6.2 (1.0)   | $4 \times 10^{-10}$ | 0.83  | KLKB1 intron   |
| rs4241820   | 4:187160081          | T  | C  | 0.63     | 6.2 (1.6)   | $2 \times 10^{-4}$ | 0.45         | 8.7 (1.3)   | $8 \times 10^{-11}$ | 7.7 (1.0)   | $1 \times 10^{-13}$ | 0.24  | KLKB1 intron   |
| rs12509937  | 4:187160250          | T  | C  | 0.41     | 8.6 (1.6)   | $9 \times 10^{-8}$ | 0.33         | 10.6 (1.5)  | $6 \times 10^{-13}$ | 9.7 (1.1)   | $5 \times 10^{-19}$ | 0.36  | KLKB1 intron   |
| rs139276089 | 4:187160394          | C  | G  | 0.34     | 6.3 (1.7)   | $3 \times 10^{-4}$ | 0.23         | 9.6 (1.8)   | $7 \times 10^{-8}$  | 7.9 (1.3)   | $3 \times 10^{-10}$ | 0.18  | KLKB1 intron   |
| rs71640034  | 4:187161048          | A  | G  | 0.46     | 8.1 (1.5)   | $1 \times 10^{-7}$ | 0.37         | 10.9 (1.4)  | $1 \times 10^{-15}$ | 9.7 (1.0)   | $2 \times 10^{-21}$ | 0.18  | KLKB1 intron   |
| rs71640036  | 4:187161120          | T  | G  | 0.50     | 9.1 (1.5)   | $1 \times 10^{-9}$ | 0.39         | 11.2 (1.3)  | $5 \times 10^{-17}$ | 10.3 (1.0)  | $1 \times 10^{-24}$ | 0.31  | KLKB1 intron   |
| rs66530140  | 4:187161211          | C  | T  | 0.52     | 8.8 (1.5)   | $2 \times 10^{-9}$ | 0.40         | 10.8 (1.3)  | $2 \times 10^{-16}$ | 9.9 (1.0)   | $7 \times 10^{-24}$ | 0.32  | KLKB1 intron   |
| rs35984397  | 4:187161501          | A  | G  | 0.52     | 8.8 (1.5)   | $2 \times 10^{-9}$ | 0.40         | 10.8 (1.3)  | $2 \times 10^{-16}$ | 9.9 (1.0)   | $7 \times 10^{-24}$ | 0.32  | KLKB1 intron   |
| rs4253266   | 4:187163369          | T  | C  | 0.26     | -6.3 (1.7)  | $2 \times 10^{-4}$ | 0.24         | -7.9 (1.6)  | $6 \times 10^{-7}$  | -7.2 (1.2)  | $7 \times 10^{-10}$ | 0.51  | KLKB1 intron   |
| rs4253269   | 4:187163511          | T  | C  | 0.30     | -6.2 (1.6)  | $1 \times 10^{-4}$ | 0.28         | -7.4 (1.5)  | $4 \times 10^{-7}$  | -6.8 (1.1)  | $3 \times 10^{-10}$ | 0.57  | KLKB1 intron   |
| rs4253271   | 4:187163612          | T  | G  | 0.48     | 8.3 (1.5)   | $5 \times 10^{-8}$ | 0.37         | 10.9 (1.4)  | $2 \times 10^{-15}$ | 9.7 (1.0)   | $2 \times 10^{-21}$ | 0.2   | KLKB1 intron   |
| rs4253272   | 4:187163614          | T  | C  | 0.48     | 8.1 (1.5)   | $9 \times 10^{-8}$ | 0.38         | 10.9 (1.4)  | $2 \times 10^{-15}$ | 9.6 (1.0)   | $3 \times 10^{-21}$ | 0.17  | KLKB1 intron   |
| rs4253273   | 4:187163626          | G  | C  | 0.67     | 5.9 (1.6)   | $3 \times 10^{-4}$ | 0.47         | 8.3 (1.3)   | $1 \times 10^{-10}$ | 7.4 (1.0)   | $4 \times 10^{-13}$ | 0.24  | KLKB1 intron   |

| SNP         | Chromosome: Position | EA | AA | European |             |                    | Indian Asian |             |                     | Meta        |                     |       | Function Class          |
|-------------|----------------------|----|----|----------|-------------|--------------------|--------------|-------------|---------------------|-------------|---------------------|-------|-------------------------|
|             |                      |    |    | EAF      | Effect (SE) | P                  | EAF          | Effect (SE) | P                   | Effect (SE) | P                   | P-het |                         |
| rs61000956  | 4:187164081          | C  | T  | 0.34     | 8.5 (1.7)   | $7 \times 10^{-7}$ | 0.33         | 11.2 (1.5)  | $9 \times 10^{-15}$ | 10.1 (1.1)  | $9 \times 10^{-20}$ | 0.21  | KLKB1 intron            |
| rs4253281   | 4:187164349          | A  | G  | 0.51     | 8.6 (1.5)   | $7 \times 10^{-9}$ | 0.40         | 10.7 (1.3)  | $5 \times 10^{-16}$ | 9.7 (1.0)   | $5 \times 10^{-23}$ | 0.29  | KLKB1 intron            |
| rs4253282   | 4:187164399          | T  | C  | 0.53     | 8.8 (1.5)   | $3 \times 10^{-9}$ | 0.40         | 10.7 (1.3)  | $3 \times 10^{-16}$ | 9.9 (1.0)   | $9 \times 10^{-24}$ | 0.34  | KLKB1 intron            |
| rs4253283   | 4:187165211          | C  | T  | 0.69     | 7.7 (1.6)   | $2 \times 10^{-6}$ | 0.47         | 8.0 (1.3)   | $5 \times 10^{-10}$ | 7.9 (1.0)   | $6 \times 10^{-15}$ | 0.9   | KLKB1 intron            |
| rs34899763  | 4:187165433          | A  | T  | 0.70     | 7.6 (1.6)   | $3 \times 10^{-6}$ | 0.48         | 8.7 (1.3)   | $1 \times 10^{-11}$ | 8.3 (1.0)   | $2 \times 10^{-16}$ | 0.61  | KLKB1 intron            |
| rs144276707 | 4:187165700          | A  | G  | 0.11     | 9.0 (2.5)   | $2 \times 10^{-3}$ | 0.23         | 9.0 (1.5)   | $4 \times 10^{-9}$  | 9.0 (1.3)   | $5 \times 10^{-12}$ | 0.98  | KLKB1 intron            |
| rs4253289   | 4:187167103          | C  | A  | 0.11     | 9.1 (2.5)   | $2 \times 10^{-3}$ | 0.23         | 9.2 (1.5)   | $1 \times 10^{-9}$  | 9.2 (1.3)   | $1 \times 10^{-12}$ | 0.96  | KLKB1 intron            |
| rs13134749  | 4:187167682          | T  | C  | 0.12     | -7.3 (2.3)  | $2 \times 10^{-3}$ | 0.19         | -7.5 (1.7)  | $7 \times 10^{-6}$  | -7.4 (1.4)  | $4 \times 10^{-8}$  | 0.95  | KLKB1 intron            |
| rs1973612   | 4:187169167          | T  | C  | 0.51     | 8.9 (1.5)   | $4 \times 10^{-9}$ | 0.39         | 10.9 (1.3)  | $2 \times 10^{-16}$ | 10.0 (1.0)  | $1 \times 10^{-23}$ | 0.32  | KLKB1 intron            |
| rs149893292 | 4:187169359          | A  | G  | 0.14     | 9.5 (2.2)   | $1 \times 10^{-5}$ | 0.25         | 9.2 (1.5)   | $8 \times 10^{-10}$ | 9.3 (1.2)   | $5 \times 10^{-14}$ | 0.9   | KLKB1 intron            |
| rs2203111   | 4:187169469          | A  | G  | 0.12     | -6.8 (2.3)  | $3 \times 10^{-3}$ | 0.19         | -7.6 (1.7)  | $3 \times 10^{-6}$  | -7.4 (1.3)  | $4 \times 10^{-8}$  | 0.77  | KLKB1 intron            |
| rs4253294   | 4:187169650          | G  | A  | 0.70     | 7.7 (1.6)   | $2 \times 10^{-6}$ | 0.48         | 8.7 (1.3)   | $7 \times 10^{-12}$ | 8.3 (1.0)   | $1 \times 10^{-16}$ | 0.62  | KLKB1 intron            |
| rs4253306   | 4:187174030          | T  | G  | 0.11     | 9.0 (2.5)   | $2 \times 10^{-4}$ | 0.23         | 9.0 (1.5)   | $2 \times 10^{-9}$  | 9.0 (1.3)   | $2 \times 10^{-12}$ | 0.99  | KLKB1 intron            |
| rs4253311   | 4:187174683          | G  | A  | 0.52     | 8.8 (1.5)   | $2 \times 10^{-9}$ | 0.39         | 10.5 (1.3)  | $6 \times 10^{-16}$ | 9.8 (1.0)   | $1 \times 10^{-23}$ | 0.39  | KLKB1 intron            |
| rs4253313   | 4:187175177          | G  | A  | 0.70     | 7.8 (1.6)   | $2 \times 10^{-6}$ | 0.47         | 8.2 (1.4)   | $8 \times 10^{-11}$ | 8.0 (1.0)   | $7 \times 10^{-16}$ | 0.84  | KLKB1 intron            |
| rs4253315   | 4:187175457          | T  | C  | 0.11     | 9.0 (2.5)   | $3 \times 10^{-4}$ | 0.22         | 9.1 (1.5)   | $2 \times 10^{-9}$  | 9.0 (1.3)   | $3 \times 10^{-12}$ | 0.99  | KLKB1 intron            |
| rs3775302   | 4:187177814          | G  | A  | 0.14     | 9.3 (2.2)   | $2 \times 10^{-5}$ | 0.23         | 9.1 (1.5)   | $1 \times 10^{-9}$  | 9.2 (1.2)   | $1 \times 10^{-13}$ | 0.92  | KLKB1 intron            |
| rs4861709   | 4:187178186          | T  | C  | 0.70     | 7.9 (1.6)   | $2 \times 10^{-6}$ | 0.48         | 8.6 (1.3)   | $1 \times 10^{-11}$ | 8.3 (1.0)   | $1 \times 10^{-16}$ | 0.75  | KLKB1 intron            |
| rs4253325   | 4:187178473          | A  | G  | 0.11     | 8.8 (2.5)   | $3 \times 10^{-4}$ | 0.23         | 9.0 (1.5)   | $2 \times 10^{-9}$  | 9.0 (1.3)   | $3 \times 10^{-12}$ | 0.95  | KLKB1 missense          |
| rs28671360  | 4:187178788          | G  | A  | 0.71     | 7.9 (1.6)   | $2 \times 10^{-6}$ | 0.48         | 8.6 (1.3)   | $9 \times 10^{-12}$ | 8.3 (1.0)   | $9 \times 10^{-17}$ | 0.72  | KLKB1 intron            |
| rs925453    | 4:187179210          | C  | T  | 0.71     | 7.9 (1.6)   | $2 \times 10^{-6}$ | 0.48         | 8.7 (1.3)   | $6 \times 10^{-12}$ | 8.4 (1.0)   | $6 \times 10^{-17}$ | 0.70  | KLKB1 synonymous-codon  |
| rs4253332   | 4:187179803          | C  | T  | 0.70     | 7.8 (1.7)   | $2 \times 10^{-6}$ | 0.48         | 8.7 (1.3)   | $8 \times 10^{-12}$ | 8.4 (1.0)   | $1 \times 10^{-16}$ | 0.68  | KLKB1 downstream-500B   |
| rs12186258  | 4:187183502          | A  | G  | 0.55     | 5.1 (1.6)   | $1 \times 10^{-3}$ | 0.36         | 7.0 (1.4)   | $1 \times 10^{-6}$  | 6.2 (1.1)   | $1 \times 10^{-8}$  | 0.38  | NA                      |
| rs4253416   | 4:187197994          | T  | C  | 0.56     | 5.9 (1.6)   | $2 \times 10^{-4}$ | 0.54         | 5.7 (1.3)   | $2 \times 10^{-5}$  | 5.8 (1.0)   | $2 \times 10^{-8}$  | 0.92  | F11 intron              |
| rs1801020   | 5:176836532          | G  | A  | 0.76     | 7.8 (1.8)   | $1 \times 10^{-5}$ | 0.57         | 6.8 (1.3)   | $2 \times 10^{-7}$  | 7.1 (1.1)   | $1 \times 10^{-11}$ | 0.63  | F12 utr-variant-5-prime |
| rs2731674   | 5:176839890          | G  | T  | 0.76     | 7.8 (1.8)   | $1 \times 10^{-5}$ | 0.56         | 6.7 (1.3)   | $2 \times 10^{-7}$  | 7.1 (1.0)   | $1 \times 10^{-11}$ | 0.62  | NA                      |
| rs2731673   | 5:176839898          | C  | T  | 0.76     | 7.9 (1.8)   | $1 \times 10^{-5}$ | 0.57         | 6.7 (1.3)   | $2 \times 10^{-7}$  | 7.0 (1.0)   | $2 \times 10^{-11}$ | 0.61  | NA                      |
| rs2545801   | 5:176841339          | C  | T  | 0.76     | 7.9 (1.8)   | $9 \times 10^{-6}$ | 0.56         | 6.8 (1.3)   | $1 \times 10^{-7}$  | 7.1 (1.0)   | $7 \times 10^{-12}$ | 0.60  | NA                      |

| SNP       | Chromosome:<br>Position | EA | AA | European |             |                    | Indian Asian |             |                    | Meta        |                     |       | Function Class |
|-----------|-------------------------|----|----|----------|-------------|--------------------|--------------|-------------|--------------------|-------------|---------------------|-------|----------------|
|           |                         |    |    | EAF      | Effect (SE) | P                  | EAF          | Effect (SE) | P                  | Effect (SE) | P                   | P-het |                |
| rs2731672 | 5:176842474             | C  | T  | 0.76     | 7.6 (1.7)   | $2 \times 10^{-5}$ | 0.56         | 6.3 (1.3)   | $5 \times 10^{-7}$ | 6.7 (1.0)   | $3 \times 10^{-11}$ | 0.53  | NA             |

Footnote: EA, effect allele; AA, alternate allele; EAF, effect allele frequency; Effect, effect size per copy of the effect allele; SE, standard error; P-het, P value for the heterogeneity test between the two ethnic groups. Lambdas are 1.008 for European, 1.004 for Indian Asian, and 1.002 for combined analysis.

**Suppl. Table 4. SNPs with suggestive associations with serum L-arginine levels in combined analysis of European and Indian Asian samples (N = 2,295,  $5 \times 10^{-8} < p < 1 \times 10^{-5}$ ).**

| SNP        | Chromosome:Position | EA | AA | EAF  | Effect | SE  | P                  | P-het | Gene and function class |
|------------|---------------------|----|----|------|--------|-----|--------------------|-------|-------------------------|
| rs1036588  | 2:5599612           | A  | C  | 0.81 | -6.0   | 1.2 | $1 \times 10^{-6}$ | 0.98  | NA                      |
| rs77488517 | 2:5600476           | T  | C  | 0.19 | 6.2    | 1.2 | $5 \times 10^{-7}$ | 0.86  | NA                      |
| rs78969375 | 2:5600563           | A  | T  | 0.81 | -6.2   | 1.2 | $5 \times 10^{-7}$ | 0.86  | NA                      |
| rs17293732 | 2:5602284           | T  | C  | 0.81 | -6.0   | 1.2 | $9 \times 10^{-7}$ | 0.77  | NA                      |
| rs700960   | 2:5603666           | A  | G  | 0.23 | 5.4    | 1.2 | $3 \times 10^{-6}$ | 0.47  | NA                      |
| rs57543999 | 2:5604048           | T  | C  | 0.20 | 6.0    | 1.2 | $8 \times 10^{-7}$ | 0.77  | NA                      |
| rs792094   | 2:5604166           | C  | G  | 0.20 | 6.0    | 1.2 | $8 \times 10^{-7}$ | 0.77  | NA                      |
| rs60196128 | 2:5604584           | A  | G  | 0.20 | 6.0    | 1.2 | $8 \times 10^{-7}$ | 0.78  | NA                      |
| rs59212612 | 2:5604637           | T  | C  | 0.80 | -6.0   | 1.2 | $8 \times 10^{-7}$ | 0.78  | NA                      |
| rs10180670 | 2:5607349           | A  | G  | 0.20 | 5.8    | 1.2 | $1 \times 10^{-6}$ | 0.68  | NA                      |
| rs16863805 | 2:5610906           | A  | G  | 0.20 | 5.8    | 1.2 | $1 \times 10^{-6}$ | 0.68  | NA                      |
| rs6743805  | 2:5612810           | A  | T  | 0.20 | 5.5    | 1.2 | $3 \times 10^{-6}$ | 0.60  | NA                      |
| rs60572809 | 2:5613376           | A  | C  | 0.20 | 5.5    | 1.2 | $3 \times 10^{-6}$ | 0.59  | NA                      |
| rs76549602 | 2:5613910           | T  | C  | 0.80 | -5.5   | 1.2 | $3 \times 10^{-6}$ | 0.57  | NA                      |
| rs17360123 | 2:5614214           | T  | G  | 0.20 | 5.5    | 1.2 | $3 \times 10^{-6}$ | 0.58  | NA                      |
| rs56277937 | 2:5614459           | T  | C  | 0.20 | 5.8    | 1.2 | $1 \times 10^{-6}$ | 0.60  | NA                      |
| rs77737322 | 3:171891992         | A  | G  | 0.96 | -16.5  | 3.4 | $1 \times 10^{-6}$ | 0.15  | FNDC3B intron           |
| rs2292429  | 4:187121126         | A  | T  | 0.44 | -5.4   | 1.0 | $1 \times 10^{-7}$ | 0.07  | CYP4V2 intron           |
| rs2292430  | 4:187121127         | A  | T  | 0.56 | 5.4    | 1.0 | $2 \times 10^{-7}$ | 0.09  | CYP4V2 intron           |
| rs3736456  | 4:187122355         | T  | C  | 0.86 | -6.8   | 1.5 | $9 \times 10^{-6}$ | 0.89  | CYP4V2 synonymous-codon |
| rs7661584  | 4:187125102         | C  | G  | 0.14 | 7.3    | 1.5 | $5 \times 10^{-7}$ | 0.80  | CYP4V2 intron           |
| rs6552963  | 4:187128478         | A  | G  | 0.53 | 5.0    | 1.0 | $5 \times 10^{-7}$ | 0.08  | CYP4V2 intron           |
| rs4862664  | 4:187136127         | T  | C  | 0.86 | -7.3   | 1.5 | $9 \times 10^{-7}$ | 0.60  | NA                      |
| rs10004932 | 4:187137482         | A  | G  | 0.57 | -4.7   | 1.0 | $3 \times 10^{-6}$ | 0.10  | NA                      |
| rs28797242 | 4:187140276         | T  | C  | 0.29 | 5.3    | 1.1 | $3 \times 10^{-6}$ | 0.49  | NA                      |
| rs74508932 | 4:187141704         | A  | C  | 0.84 | 6.4    | 1.4 | $7 \times 10^{-6}$ | 0.38  | NA                      |

| SNP         | Chromosome:Position | EA | AA | EAF  | Effect | SE  | P                  | P-het | Gene and function class |
|-------------|---------------------|----|----|------|--------|-----|--------------------|-------|-------------------------|
| rs2221843   | 4:187144200         | C  | G  | 0.72 | 5.3    | 1.1 | $2 \times 10^{-6}$ | 0.63  | NA                      |
| rs13102931  | 4:187145626         | T  | G  | 0.15 | -7.5   | 1.4 | $6 \times 10^{-8}$ | 0.60  | NA                      |
| rs13102788  | 4:187145738         | T  | C  | 0.15 | -7.5   | 1.4 | $6 \times 10^{-8}$ | 0.60  | NA                      |
| rs10014399  | 4:187146359         | C  | G  | 0.72 | 5.3    | 1.1 | $2 \times 10^{-6}$ | 0.61  | NA                      |
| rs4253241   | 4:187149233         | T  | C  | 0.85 | 7.5    | 1.4 | $5 \times 10^{-8}$ | 0.63  | KLKB1 intron            |
| rs1511802   | 4:187150806         | T  | C  | 0.71 | -5.3   | 1.1 | $3 \times 10^{-6}$ | 0.50  | KLKB1 intron            |
| rs4253243   | 4:187153511         | T  | C  | 0.84 | 6.3    | 1.4 | $8 \times 10^{-6}$ | 0.37  | KLKB1 intron            |
| rs4253246   | 4:187154424         | A  | T  | 0.84 | 7.5    | 1.4 | $5 \times 10^{-8}$ | 0.68  | KLKB1 intron            |
| rs4253251   | 4:187156473         | C  | G  | 0.28 | -5.3   | 1.1 | $2 \times 10^{-6}$ | 0.69  | KLKB1 intron            |
| rs184644242 | 4:187157181         | T  | G  | 0.84 | 7.4    | 1.4 | $6 \times 10^{-8}$ | 0.60  | KLKB1 intron            |
| rs145549717 | 4:187157232         | T  | C  | 0.18 | -6.3   | 1.4 | $3 \times 10^{-6}$ | 0.78  | KLKB1 intron            |
| rs4253253   | 4:187158433         | A  | G  | 0.72 | -5.8   | 1.2 | $1 \times 10^{-6}$ | 0.65  | KLKB1 intron            |
| rs71640035  | 4:187161061         | T  | G  | 0.74 | -5.7   | 1.2 | $4 \times 10^{-6}$ | 0.60  | KLKB1 intron            |
| rs114652910 | 4:187161317         | T  | G  | 0.84 | 7.4    | 1.4 | $8 \times 10^{-8}$ | 0.73  | KLKB1 intron            |
| rs28380417  | 4:187161506         | A  | T  | 0.28 | -5.4   | 1.1 | $1 \times 10^{-6}$ | 0.66  | KLKB1 intron            |
| rs4253259   | 4:187162048         | T  | G  | 0.08 | 9.9    | 2.0 | $5 \times 10^{-7}$ | 0.48  | KLKB1 intron            |
| rs13126698  | 4:187163268         | T  | C  | 0.84 | 7.3    | 1.4 | $1 \times 10^{-7}$ | 0.76  | KLKB1 intron            |
| rs4253274   | 4:187163652         | T  | G  | 0.28 | -5.3   | 1.1 | $2 \times 10^{-6}$ | 0.65  | KLKB1 intron            |
| rs4253276   | 4:187163859         | C  | G  | 0.12 | 7.6    | 1.7 | $5 \times 10^{-6}$ | 0.57  | KLKB1 intron            |
| rs4253277   | 4:187163881         | A  | G  | 0.72 | 5.3    | 1.1 | $2 \times 10^{-6}$ | 0.68  | KLKB1 intron            |
| rs4253284   | 4:187165526         | A  | G  | 0.84 | 7.2    | 1.4 | $1 \times 10^{-7}$ | 0.79  | KLKB1 intron            |
| rs80177406  | 4:187166024         | A  | G  | 0.28 | 5.6    | 1.2 | $2 \times 10^{-6}$ | 0.49  | KLKB1 intron            |
| rs35792324  | 4:187167882         | C  | G  | 0.16 | -7.4   | 1.4 | $8 \times 10^{-8}$ | 0.79  | KLKB1 intron            |
| rs4253290   | 4:187168438         | T  | C  | 0.16 | -7.3   | 1.4 | $9 \times 10^{-8}$ | 0.79  | KLKB1 intron            |
| rs2175494   | 4:187168782         | A  | T  | 0.72 | 5.3    | 1.1 | $2 \times 10^{-6}$ | 0.70  | KLKB1 intron            |
| rs2175495   | 4:187169123         | T  | C  | 0.29 | 5.5    | 1.1 | $1 \times 10^{-6}$ | 0.43  | KLKB1 intron            |
| rs2137145   | 4:187169266         | A  | G  | 0.28 | -5.3   | 1.1 | $2 \times 10^{-6}$ | 0.68  | KLKB1 intron            |
| rs4253295   | 4:187170222         | A  | G  | 0.71 | -5.5   | 1.1 | $1 \times 10^{-6}$ | 0.43  | KLKB1 intron            |
| rs4253296   | 4:187170545         | T  | C  | 0.84 | 7.2    | 1.4 | $1 \times 10^{-7}$ | 0.83  | KLKB1 intron            |

| SNP         | Chromosome:Position | EA | AA | EAF  | Effect | SE  | P                  | P-het | Gene and function class |
|-------------|---------------------|----|----|------|--------|-----|--------------------|-------|-------------------------|
| rs4253297   | 4:187170747         | T  | C  | 0.29 | 5.5    | 1.1 | $1 \times 10^{-6}$ | 0.45  | KLKB1 intron            |
| rs4253299   | 4:187171355         | A  | G  | 0.28 | -5.3   | 1.1 | $2 \times 10^{-6}$ | 0.70  | KLKB1 intron            |
| rs2304595   | 4:187172280         | A  | G  | 0.30 | 6.1    | 1.1 | $5 \times 10^{-8}$ | 0.73  | KLKB1 intron            |
| rs4253301   | 4:187173012         | T  | G  | 0.84 | 7.0    | 1.3 | $2 \times 10^{-7}$ | 0.89  | KLKB1 missense          |
| rs4253303   | 4:187173546         | A  | G  | 0.29 | 5.5    | 1.1 | $1 \times 10^{-6}$ | 0.45  | KLKB1 intron            |
| rs4253304   | 4:187173571         | C  | G  | 0.30 | 6.1    | 1.1 | $7 \times 10^{-8}$ | 0.71  | KLKB1 intron            |
| rs4253305   | 4:187173691         | A  | G  | 0.70 | -6.1   | 1.1 | $7 \times 10^{-8}$ | 0.71  | KLKB1 intron            |
| rs4253308   | 4:187174363         | A  | C  | 0.71 | -5.5   | 1.1 | $1 \times 10^{-6}$ | 0.45  | KLKB1 intron            |
| rs4253314   | 4:187175235         | T  | C  | 0.16 | -7.1   | 1.3 | $1 \times 10^{-7}$ | 0.90  | KLKB1 intron            |
| rs2292423   | 4:187175722         | A  | T  | 0.30 | 6.1    | 1.1 | $6 \times 10^{-8}$ | 0.73  | KLKB1 intron            |
| rs4253320   | 4:187176626         | T  | C  | 0.29 | 5.5    | 1.1 | $1 \times 10^{-6}$ | 0.48  | KLKB1 intron            |
| rs4241821   | 4:187176834         | T  | C  | 0.28 | -5.3   | 1.1 | $2 \times 10^{-6}$ | 0.70  | KLKB1 intron            |
| rs3775303   | 4:187178014         | A  | T  | 0.70 | -6.1   | 1.1 | $5 \times 10^{-8}$ | 0.76  | KLKB1 intron            |
| rs4241822   | 4:187178300         | T  | C  | 0.70 | -5.7   | 1.1 | $3 \times 10^{-7}$ | 0.78  | KLKB1 intron            |
| rs4253326   | 4:187178599         | T  | C  | 0.72 | 5.3    | 1.1 | $2 \times 10^{-6}$ | 0.71  | KLKB1 intron            |
| rs4253331   | 4:187179135         | T  | C  | 0.84 | 6.3    | 1.4 | $8 \times 10^{-6}$ | 0.33  | KLKB1 intron            |
| rs3822055   | 4:187179678         | T  | C  | 0.28 | -5.2   | 1.1 | $3 \times 10^{-6}$ | 0.79  | KLKB1 downstream-500B   |
| rs13151625  | 4:187180655         | A  | G  | 0.84 | 7.4    | 1.4 | $8 \times 10^{-8}$ | 0.90  | NA                      |
| rs58527029  | 4:187182093         | A  | G  | 0.89 | -7.6   | 1.7 | $6 \times 10^{-6}$ | 0.52  | NA                      |
| rs59634726  | 4:187182296         | A  | C  | 0.11 | 7.6    | 1.7 | $7 \times 10^{-6}$ | 0.51  | NA                      |
| rs2055916   | 4:187196510         | A  | G  | 0.48 | 4.5    | 1.0 | $9 \times 10^{-6}$ | 0.75  | F11 intron              |
| rs4253415   | 4:187197943         | A  | T  | 0.83 | 6.8    | 1.4 | $6 \times 10^{-7}$ | 0.90  | F11 intron              |
| rs36054182  | 4:187212987         | A  | G  | 0.17 | -6.4   | 1.3 | $2 \times 10^{-6}$ | 0.84  | F11-AS1 intron          |
| rs13145616  | 4:187215016         | A  | C  | 0.19 | -5.7   | 1.3 | $7 \times 10^{-6}$ | 0.28  | F11-AS1 intron          |
| rs4976691   | 5:176827815         | C  | G  | 0.45 | -5.1   | 1.1 | $1 \times 10^{-6}$ | 0.98  | PFN3 upstream-2KB       |
| rs17876032  | 5:176830627         | A  | G  | 0.55 | 5.2    | 1.1 | $1 \times 10^{-6}$ | 0.88  | F12 intron              |
| rs17876031  | 5:176831119         | A  | G  | 0.44 | -5.2   | 1.1 | $1 \times 10^{-6}$ | 0.89  | F12 intron              |
| rs4976649   | 5:176833415         | A  | G  | 0.47 | 5.0    | 1.1 | $7 \times 10^{-6}$ | 0.93  | F12 intron              |
| rs140783283 | 6:31306779          | A  | G  | 0.53 | 4.4    | 1.0 | $8 \times 10^{-6}$ | 0.46  | NA                      |

| SNP         | Chromosome:Position | EA | AA | EAF  | Effect | SE  | P                  | P-het | Gene and function class                    |
|-------------|---------------------|----|----|------|--------|-----|--------------------|-------|--------------------------------------------|
| rs2781668   | 6:131897278         | T  | C  | 0.20 | 5.8    | 1.2 | $2 \times 10^{-6}$ | 0.03  | ARG1 intron                                |
| rs2246012   | 6:131898208         | T  | C  | 0.78 | -5.8   | 1.2 | $7 \times 10^{-7}$ | 0.02  | ARG1 intron                                |
| rs2608985   | 6:131917379         | A  | G  | 0.78 | -5.8   | 1.2 | $5 \times 10^{-7}$ | 0.01  | MED23 intron                               |
| rs2608984   | 6:131918839         | A  | T  | 0.78 | -5.8   | 1.2 | $5 \times 10^{-7}$ | 0.01  | MED23 intron                               |
| rs2248551   | 6:131924689         | A  | G  | 0.22 | 5.8    | 1.2 | $5 \times 10^{-7}$ | 0.01  | MED23 intron                               |
| rs2608953   | 6:131926334         | T  | C  | 0.22 | 5.7    | 1.2 | $9 \times 10^{-7}$ | 0.01  | MED23 intron                               |
| rs2245133   | 6:131931092         | T  | C  | 0.78 | -5.8   | 1.2 | $7 \times 10^{-6}$ | 0.02  | MED23 intron                               |
| rs3756785   | 6:131950401         | T  | C  | 0.78 | -5.7   | 1.2 | $1 \times 10^{-6}$ | 0.01  | MED23 upstream-2KB                         |
| rs3843995   | 6:131950798         | A  | G  | 0.78 | -5.7   | 1.2 | $1 \times 10^{-6}$ | 0.01  | MED23 upstream-2KB                         |
| rs73550998  | 6:131960039         | T  | C  | 0.77 | -5.3   | 1.2 | $6 \times 10^{-6}$ | 0.02  | ENPP3 intron                               |
| rs12663047  | 6:131960898         | A  | G  | 0.78 | -5.2   | 1.2 | $8 \times 10^{-6}$ | 0.02  | ENPP3 intron                               |
| rs3850246   | 6:131965872         | T  | G  | 0.22 | 5.2    | 1.2 | $8 \times 10^{-6}$ | 0.02  | ENPP3 intron                               |
| rs140018894 | 7:64388840          | A  | G  | 0.98 | -28.8  | 5.8 | $6 \times 10^{-7}$ | 0.58  | ZNF273 synonymous-codon /<br>nc-transcript |
| rs113262228 | 8:70458044          | T  | G  | 0.02 | 20.5   | 4.1 | $4 \times 10^{-7}$ | 0.60  | SULF1 intron                               |
| rs12342073  | 9:107063809         | T  | C  | 0.10 | 8.4    | 1.8 | $5 \times 10^{-6}$ | 0.72  | NA                                         |
| rs75256538  | 11:11049373         | T  | C  | 0.10 | 7.8    | 1.7 | $6 \times 10^{-6}$ | 0.49  | NA                                         |
| rs59772322  | 11:11052230         | C  | G  | 0.90 | -7.8   | 1.6 | $2 \times 10^{-6}$ | 0.46  | NA                                         |
| rs60940583  | 11:11052364         | T  | C  | 0.10 | 7.6    | 1.7 | $8 \times 10^{-6}$ | 0.53  | NA                                         |
| rs74986670  | 11:11054362         | A  | C  | 0.10 | 7.6    | 1.7 | $8 \times 10^{-6}$ | 0.55  | NA                                         |
| rs7928883   | 11:11054491         | T  | C  | 0.10 | 7.6    | 1.7 | $8 \times 10^{-6}$ | 0.55  | NA                                         |
| rs77775723  | 11:16377045         | A  | G  | 0.11 | -7.5   | 1.6 | $5 \times 10^{-6}$ | 0.52  | SOX6 intron                                |
| rs12805751  | 11:16379906         | T  | C  | 0.89 | 7.5    | 1.6 | $5 \times 10^{-6}$ | 0.52  | SOX6 intron                                |
| rs76908888  | 11:16381377         | A  | G  | 0.11 | -7.5   | 1.6 | $5 \times 10^{-6}$ | 0.53  | SOX6 intron                                |
| rs34617734  | 11:16381919         | A  | C  | 0.11 | -7.6   | 1.7 | $5 \times 10^{-6}$ | 0.53  | SOX6 intron                                |
| rs10769478  | 11:48838364         | T  | G  | 0.28 | 7.0    | 1.6 | $8 \times 10^{-6}$ | 0.04  | NA                                         |
| rs2192139   | 12:11012676         | A  | C  | 0.17 | -5.9   | 1.3 | $7 \times 10^{-6}$ | 0.74  | PRH1-PRR4 intron                           |
| rs10845223  | 12:11013739         | T  | G  | 0.83 | 5.9    | 1.3 | $7 \times 10^{-6}$ | 0.73  | PRH1-PRR4 intron                           |
| rs7978300   | 12:11013926         | T  | C  | 0.15 | -6.1   | 1.4 | $1 \times 10^{-5}$ | 0.61  | PRH1-PRR4 intron                           |

| SNP         | Chromosome:Position | EA | AA | EAF  | Effect | SE  | P                  | P-het | Gene and function class |
|-------------|---------------------|----|----|------|--------|-----|--------------------|-------|-------------------------|
| rs965243    | 12:11021008         | A  | T  | 0.83 | 5.8    | 1.3 | $1 \times 10^{-5}$ | 0.72  | PRH1-PRR4 intron        |
| rs112458672 | 12:53257605         | A  | G  | 0.08 | -8.4   | 1.8 | $6 \times 10^{-6}$ | 0.64  | NA                      |
| rs1405462   | 12:131491589        | A  | G  | 0.33 | -5.2   | 1.2 | $7 \times 10^{-6}$ | 0.25  | GPR133 intron           |
| rs191118886 | 14:23202906         | A  | G  | 0.02 | 23.8   | 4.6 | $2 \times 10^{-7}$ | 0.27  | NA                      |
| rs12890532  | 14:91087638         | T  | C  | 0.71 | -5.7   | 1.3 | $9 \times 10^{-6}$ | 0.43  | TTC7B intron            |
| rs11074732  | 16:25924212         | A  | G  | 0.70 | 5.3    | 1.2 | $6 \times 10^{-6}$ | 0.97  | HS3ST4 intron           |
| rs4787785   | 16:25925254         | A  | G  | 0.30 | -5.3   | 1.2 | $7 \times 10^{-6}$ | 0.92  | HS3ST4 intron           |
| rs62639554  | 16:25925744         | T  | G  | 0.30 | -5.3   | 1.2 | $5 \times 10^{-6}$ | 0.99  | HS3ST4 intron           |
| rs2526062   | 16:74047671         | A  | C  | 0.27 | -5.3   | 1.1 | $2 \times 10^{-6}$ | 0.49  | NA                      |
| rs147395646 | 18:65272325         | C  | G  | 0.94 | -10.8  | 2.4 | $5 \times 10^{-6}$ | 0.44  | LOC643542 intron        |
| rs117063294 | 18:65278962         | A  | G  | 0.06 | 10.6   | 2.3 | $5 \times 10^{-6}$ | 0.46  | LOC643542 intron        |
| rs7258587   | 19:37985806         | C  | G  | 0.04 | 17.5   | 3.8 | $4 \times 10^{-6}$ | 0.87  | NA                      |
| rs6126720   | 20:51629366         | A  | C  | 0.06 | -8.9   | 2.0 | $1 \times 10^{-6}$ | 0.42  | TSHZ2 intron            |
| rs16997425  | 20:51629429         | A  | C  | 0.94 | 8.9    | 2.0 | $9 \times 10^{-6}$ | 0.29  | TSHZ2 intron            |
| rs6022211   | 20:51629630         | A  | G  | 0.06 | -8.9   | 2.0 | $9 \times 10^{-6}$ | 0.29  | TSHZ2 intron            |
| rs6013600   | 20:51630425         | T  | C  | 0.06 | -9.1   | 2.0 | $6 \times 10^{-6}$ | 0.33  | TSHZ2 intron            |
| rs6013601   | 20:51630780         | T  | C  | 0.06 | -9.1   | 2.0 | $7 \times 10^{-6}$ | 0.25  | TSHZ2 intron            |

Footnote: EA, effect allele; AA, alternate allele; EAF, effect allele frequency; Effect, effect size per copy of the effect allele; SE, standard error; P-het, P value for the heterogeneity test between the two ethnic groups. Lambdas are 1.008 for European, 1.004 for Indian Asian, and 1.002 for combined analysis.

**Suppl. Table 5. eQTL analysis of the sentinel or its proxy SNPs.**

| SNP          | EA/AA | Locus         | Sample set | N   | Effect | P                    | Pcorr <sup>†</sup> |
|--------------|-------|---------------|------------|-----|--------|----------------------|--------------------|
| <b>Blood</b> |       |               |            |     |        |                      |                    |
| rs71640036   | G/T   | <i>KLKB1</i>  | LOLIPOP    | 816 | -0.004 | $5 \times 10^{-1}$   | n.s.               |
|              |       | <i>CYP4V2</i> | LOLIPOP    | 816 | -0.064 | $1 \times 10^{-3}$   | $1 \times 10^{-2}$ |
| rs2545801    | T/C   | <i>F12</i>    | LOLIPOP    | 816 | -0.04  | $1 \times 10^{-3}$   | $4 \times 10^{-2}$ |
| <b>Liver</b> |       |               |            |     |        |                      |                    |
| rs71640036   | G/T   | <i>KLKB1</i>  | NA         | NA  | NA     | NA                   | NA                 |
| rs2731672*   | T/C   | <i>F12</i>    | HLC        | 427 | NA     | $1 \times 10^{-23}$  | NA                 |
|              |       |               | UC         | 206 | -0.56  | $<1 \times 10^{-16}$ | NA                 |
|              |       |               | UW         | 60  | -0.37  | $2 \times 10^{-6}$   | NA                 |
|              |       |               | Merck      | 266 | -0.18  | $2 \times 10^{-13}$  | NA                 |
|              |       |               | RYGB       | 651 | NA     | $6 \times 10^{-53}$  | NA                 |

Footnote: EA, effect allele; AA, alternate allele; Effect, eQTL effect size per effect allele copy; N, eQTL study sample size; Blood, peripheral blood leucocytes. \*proxy SNP for rs2545801 ( $r^2 = 0.99$ ); <sup>†</sup>Pcorr, P value after bonferroni correction for 14 and 38 genes tested within 1Mb either side of the two sentinel SNPs rs71640036 and rs2545801, respectively, in blood samples. Listed are all genes with p-values < 0.05; n.s., non-significant; UC(1), University of Chicago; UW (1), university of Washington; Merck (1), Merck study; HLC (2), human liver cohort; RYGB (3), Roux-en-Y gastric bypass cohort in extreme obese patients; LOLIPOP, the LOLIPOP study; NA, data not available or non-applicable.

**Suppl. Table 6. Association of sentinel SNPs (or their best available proxy) with other traits in published genome-wide association studies.**

| SNP                 | EA/AA | r <sup>2</sup> | Trait                                 | N      | Effect | P                    |
|---------------------|-------|----------------|---------------------------------------|--------|--------|----------------------|
| <b><i>KLKB1</i></b> |       |                |                                       |        |        |                      |
| rs3733402*          | G/A   | 0.96           | Histidine (4)                         | 8,330  | -0.11  | 6×10 <sup>-11</sup>  |
|                     |       |                | Histidine / Valine (4)                | 8,330  | -0.11  | 3×10 <sup>-12</sup>  |
|                     |       |                | Alanine / Histidine (4)               | 8,330  | 0.11   | 3×10 <sup>-12</sup>  |
|                     |       |                | Phenylalanine / Valine (4)            | 8,330  | -0.10  | 1×10 <sup>-10</sup>  |
|                     |       |                | Leucylphenylalanine (5)               | 1,260  | -0.28  | 7×10 <sup>-25</sup>  |
|                     |       |                | HXGXA (5)                             | 1,260  | -0.44  | 9×10 <sup>-27</sup>  |
|                     |       |                | IGF-1 free (6)                        | 815    | 0.04   | 9×10 <sup>-8</sup>   |
|                     |       |                | Log plasma BNP (7)                    | 2,790  | 0.20   | 2×10 <sup>-11</sup>  |
|                     |       |                | Active plasma renin (8)               | 1,180  | -0.06  | 7×10 <sup>-5</sup>   |
| rs4253252*          | T/G   | 0.96           | des-arg(9) Bradykinin (9)             | 2,231  | -0.24  | 7×10 <sup>-18</sup>  |
|                     |       |                | hsCRP (10)                            | 66,185 | 0.012  | 6×10 <sup>-2</sup>   |
| rs1912826*          | G/A   | 0.96           | Phenylalanine (11)                    | 6,608  | < 0    | 4×10 <sup>-12</sup>  |
| rs4253238*          | C/T   | 0.96           | MR-pro-ADM (12)                       | 3,444  | 0.03   | 4×10 <sup>-52</sup>  |
|                     |       |                | CT-pro-ET-1 (12)                      | 3,444  | 5.14   | 1×10 <sup>-122</sup> |
| rs4253311*          | A/G   | 0.96           | Plasma renin activity (13)            | 5,275  | -0.10  | 6×10 <sup>-8</sup>   |
| <b><i>F12</i></b>   |       |                |                                       |        |        |                      |
| rs2545801           | T/C   | -              | aPTT (14)                             | 11,851 | 1.68   | 7×10 <sup>-88</sup>  |
|                     |       |                | Phenylalanine (4)                     | 8,330  | -0.12  | 9×10 <sup>-11</sup>  |
|                     |       |                | des-arg(9) Bradykinin (15)            | 5,194  | -0.16  | 1×10 <sup>-17</sup>  |
|                     |       |                | Arginine / des-arg(9) Bradykinin (15) | 6,054  | -0.15  | 4×10 <sup>-13</sup>  |
|                     |       |                | FXII antigen (16)                     | 2100   | -0.85  | 2×10 <sup>-94</sup>  |
| rs2731672*          | T/C   | 0.99           | MR-pro-ADM (12)                       | 3,444  | 0.02   | 6×10 <sup>-24</sup>  |
|                     |       |                | CT-pro-ET-1 (12)                      | 3,444  | 4.61   | 1×10 <sup>-67</sup>  |
| rs1808020*          | A/G   | 0.99           | hsCRP (10)                            | 66,185 | -0.02  | 3×10 <sup>-2</sup>   |
|                     |       |                | Active plasma renin (8)               | 1,179  | -0.06  | 3×10 <sup>-4</sup>   |

Footnote: EA, effect allele (minor allele, all associated with reduced serum L-arginine levels); AA, alternate allele; r<sup>2</sup>, LD with sentinel SNP (rs71640036 in *KLKB1* and rs2545801 in *F12* loci) in samples of European descent from this study; IGF-1, fasting serum insulin-like growth factor-1; BNP, B-Type Natriuretic Peptide; hsCRP, high-sensitivity C-reactive protein; MR-pro-ADM, plasma midregional-proadrenomedullin; CT-pro-ET-1, plasma C-terminal-pro-endothelin-1;

aPTT, activated partial thromboplastin time; NA, data not available; \*proxy of its related sentinel SNP.

## Suppl. References

1. Innocenti F, Cooper GM, Stanaway IB, et al. Identification, replication, and functional fine-mapping of expression quantitative trait loci in primary human liver tissue. *PLoS Genet* 2011; 7: e1002078.
2. Schadt EE, Molony C, Chudin E, et al. Mapping the genetic architecture of gene expression in human liver. *PLoS Biol* 2008; 6: e107.
3. Greenawalt DM, Dobrin R, Chudin E, et al. A survey of the genetics of stomach, liver, and adipose gene expression from a morbidly obese cohort. *Genome Res* 2011; 21: 1008-1016.
4. Kettunen J, Tukiainen T, Sarin AP, et al. Genome-wide association study identifies multiple loci influencing human serum metabolite levels. *Nat Genet* 2012; 44: 269-276.
5. Yu B, Zheng Y, Alexander D, et al. Genetic determinants influencing human serum metabolome among African Americans. *PLoS Genet* 2014; 10: e1004212.
6. Comuzzie AG, Cole SA, Laston SL, et al. Novel genetic loci identified for the pathophysiology of childhood obesity in the Hispanic population. *PLoS One* 2012; 7: e51954.
7. Musani SK, Fox ER, Kraja A, et al. Genome-wide association analysis of plasma B-type natriuretic peptide in blacks: the Jackson Heart Study. *Circ Cardiovasc Genet* 2015; 8: 122-130.
8. Biswas N, Maihofer AX, Mir SA, et al. Polymorphisms at the F12 and KLKB1 loci have significant trait association with activation of the renin-angiotensin system. *BMC Med Genet* 2016; 17: 21.
9. Suhre K, Shin SY, Petersen AK, et al. Human metabolic individuality in biomedical and pharmaceutical research. *Nature* 2011; 477: 54-60.
10. Dehghan A, Dupuis J, Barbalic M, et al. Meta-analysis of genome-wide association studies in >80 000 subjects identifies multiple loci for C-reactive protein levels. *Circulation* 2011; 123: 731-738.
11. Inouye M, Ripatti S, Kettunen J, et al. Novel Loci for metabolic networks and multi-tissue expression studies reveal genes for atherosclerosis. *PLoS Genet* 2012; 8: e1002907.
12. Verweij N, Mahmud H, Mateo Leach I, et al. Genome-wide association study on plasma levels of midregional-proadrenomedullin and C-terminal-pro-endothelin-1. *Hypertension* 2013; 61: 602-608.
13. Lieb W, Chen MH, Teumer A, et al. Genome-wide meta-analyses of plasma renin activity and concentration reveal association with the kininogen 1 and prekallikrein genes. *Circ Cardiovasc Genet* 2015; 8: 131-140.
14. Tang W, Schwienbacher C, Lopez LM, et al. Genetic associations for activated partial thromboplastin time and prothrombin time, their gene expression profiles, and risk of coronary artery disease. *Am J Hum Genet* 2012; 91: 152-162.
15. Shin SY, Fauman EB, Petersen AK, et al. An atlas of genetic influences on human blood metabolites. *Nat Genet* 2014; 46: 543-550.
16. Williams FM, Carter AM, Hysi PG, et al. Ischemic stroke is associated with the ABO locus: the EuroCLOT study. *Ann Neurol* 2013; 73: 16-31.
